JEXBIO/2013/091058 Revised

**Lactate kinetics of rainbow trout during graded exercise:**

**Do catheters affect the cost of transport?**

Loïc Teulier<sup>1,2</sup>, Teye Omlin<sup>1</sup> and Jean-Michel Weber<sup>1</sup>

<sup>1</sup> Biology, University of Ottawa, Ottawa, Ontario, Canada K1N 6N5

<sup>2</sup> Laboratoire d'Ecologie des Hydrosystèmes Naturels et Anthropisés, UMR 5023, CNRS,  
Université de Lyon 1, Lyon, France

Running head: Lactate kinetics in swimming trout

Key words: lactate turnover, carbohydrate metabolism, locomotion energetics, fish exercise, critical swimming speed ( $U_{crit}$ ), continuous tracer infusion, respirometry, *Oncorhynchus mykiss*

Corresponding author: Jean-Michel Weber  
Biology, University of Ottawa  
30 Marie Curie, Ottawa, Ontario, Canada K1N 6N5

e-mail: jmweber@uOttawa.ca  
Phone: 613-562-5800 ext. 6007  
FAX: 613-562-5486

1 SUMMARY

2

3 Changes in lactate kinetics as a function of exercise intensity have never been measured  
4 in an ectotherm. Continuous infusion of tracer is necessary to quantify rates of lactate  
5 appearance ( $R_a$ ) and disposal ( $R_d$ ), but it requires double catheterization that could interfere  
6 with swimming. Using rainbow trout, our goals were: (1) to determine the potential effects of  
7 catheters and blood sampling on metabolic rate ( $MO_2$ ), total cost of transport (TCOT), net cost  
8 of transport (NCOT), and critical swimming speed ( $U_{crit}$ ), and (2) to monitor changes in lactate  
9 fluxes during prolonged, steady-state swimming or graded swimming from rest to  $U_{crit}$ . This  
10 athletic species maintains high baseline lactate fluxes of  $24 \mu\text{mol kg}^{-1} \text{min}^{-1}$  that are only  
11 increased at intensities  $>2.4$  body lengths per s ( $\text{BL s}^{-1}$ ) or 85%  $U_{crit}$ . As the fish reaches  $U_{crit}$ ,  
12  $R_a$  lactate is more strongly stimulated (+67% to  $40.4 \mu\text{mol kg}^{-1} \text{min}^{-1}$ ) than  $R_d$  lactate (+41% to  
13  $34.7 \mu\text{mol kg}^{-1} \text{min}^{-1}$ ), causing a 4-fold increase in blood lactate concentration. Without this  
14 stimulation of  $R_d$  during intense swimming, lactate accumulation would double. By contrast,  
15 steady-state exercise at  $1.7 \text{BL s}^{-1}$  increases lactate fluxes to  $\sim 30 \mu\text{mol kg}^{-1} \text{min}^{-1}$ , with a trivial  
16 mismatch between  $R_a$  and  $R_d$  that only affects blood concentration minimally. Results also  
17 show that the catheterizations and blood sampling needed to measure metabolite kinetics in  
18 exercising fish have no significant impact on  $MO_2$  or TCOT. However, these experimental  
19 procedures affect locomotion energetics by increasing NCOT at high speeds and by decreasing  
20  $U_{crit}$ .

21

## 22 INTRODUCTION

23

24 As glycolytic end-product, oxidative fuel and gluconeogenic substrate, lactate is one of  
25 the most dynamic intermediates of cell metabolism (Brooks, 1991; Gladden, 2004; Philp et al.,  
26 2005). Animals process lactate at high rates even under resting, normoxic conditions and, in  
27 mammals, many studies show that inherently high baseline lactate fluxes are strongly  
28 stimulated during exercise (Bergman et al., 1999; Donovan and Brooks, 1983; Issekutz Jr et  
29 al., 1976; Stanley et al., 1985; van Hall et al., 2003; Weber et al., 1987). Little is known for  
30 fish because adequate methods to quantify lactate fluxes accurately under controlled exercise  
31 conditions have only become available recently. Previous studies of fish lactate kinetics report  
32 turnover rates that were estimated by bolus injection (Cameron and Cech Jr., 1990; Milligan  
33 and McDonald, 1988; Weber, 1991; Weber et al., 1986): an obsolete method with significant  
34 limitations (Omlin and Weber, 2010; Wolfe, 1992). They show that the lactate turnover rate of  
35 rainbow trout doubles during prolonged, low-intensity swimming (Weber, 1991). Although no  
36 measurements have been made at higher swimming speeds, a 3 to 10-fold increase over  
37 baseline has been observed during recovery from exhausting exercise for channel catfish  
38 (*Ictalurus punctatus*), coho salmon (*Oncorhynchus kisutch*), and starry flounder (*Platichthys*  
39 *stellatus*) (Cameron and Cech Jr., 1990; Milligan and McDonald, 1988). Continuous tracer  
40 infusion techniques have been adapted and validated for fish (Haman et al., 1997; Haman and  
41 Weber, 1996). They have been used to quantify the rates of metabolite appearance ( $R_a$ ) and  
42 disposal ( $R_d$ ) accurately under non-steady state conditions. In particular, continuous infusion  
43 has been used to characterize the effects of swimming on glucose and lipid kinetics (Bernard et  
44 al., 1999; Magnoni et al., 2008; Shanghavi and Weber, 1999). Unfortunately, these fish  
45 measurements only deal with prolonged, low-intensity swimming. Therefore, nothing is known  
46 about the differential effects of higher intensity exercise on the rates of lactate production and  
47 disposal, when significant changes in blood lactate concentration are observed.

48

49 Measuring metabolite kinetics by continuous infusion during swimming may be  
50 problematic because two catheters exiting from the snout of the fish are necessary (Haman and  
51 Weber, 1996). The hydrodynamic drag associated with these catheters may interfere with  
52 locomotion, and blood sampling may decrease capacity for oxygen transport. Therefore,

53 cannulated fish may have a different metabolic rate ( $MO_2$ ), a higher cost of transport [total cost  
54 (TCOT) or net cost (NCOT)](Schmidt-Nielsen, 1972), and a lower critical swimming speed  
55 ( $U_{crit}$ ; Farrell, 2008) than non-catheterized animals. The cost of transport is the amount of  
56 energy (or oxygen) used to move one unit body mass by one unit distance. TCOT is the total  
57 amount of energy needed to power movement, including the cost of sustaining life in resting  
58 tissues. By contrast, NCOT only accounts for the cost of locomotion, but it excludes all  
59 maintenance costs incurred at rest. To allow meaningful comparisons between fish studies,  
60 exercise intensity is traditionally standardized as % $U_{crit}$  or as swimming speed in body  
61 lengths/s ( $BL\ s^{-1}$ ). However, it is unclear whether non-instrumented and catheterized animals  
62 swimming at the same % $U_{crit}$  or at the same speed have the same  $MO_2$ . Therefore, the goals of  
63 this study were: (1) to determine whether double catheterization and blood sampling have an  
64 effect on  $MO_2$ , TCOT, NCOT or  $U_{crit}$  in rainbow trout, (2) to apply continuous tracer infusion  
65 methods to measure the effects of steady swimming on lactate fluxes, and (3) to determine the  
66 relationship between exercise intensity and the rates of lactate production and disposal, using a  
67 graded swimming protocol.

68

69

## 70 **METHODS**

71

### 72 *Animals*

73 Male and female rainbow trout (*Oncorhynchus mykiss*, Walbaum) were purchased from  
74 Linwood Acres Trout Farm (Campbellcroft, Ontario, Canada)(see Table 1). They were held in  
75 a 1300-liter flow-through tank containing dechlorinated, well-oxygenated water at 13°C for at  
76 least 2 weeks before experiments. Fish were kept under a 12h:12h light-dark photoperiod and  
77 fed commercial floating pellets (Martin Mills, Elmira, Ontario, Canada) 3 times a week until  
78 satiation. The effects of exercise were either measured during prolonged, steady-state  
79 swimming at 1.7  $BLs^{-1}$  or during graded swimming ( $U_{crit}$  protocol). Fish used for graded  
80 exercise were randomly divided in 2 sub-groups: control/sham-catheterization (to measure  
81 swimming energetics only) and actual catheterization (to measure swimming energetics and  
82 lactate kinetics). To avoid training or fatigue effects in the first sub-group, locomotion  
83 energetics were measured in random order for the control (no catheters) and sham-catheterized

84 conditions in the same individuals. The steady-state swimming group was catheterized to  
85 measure lactate kinetics only. All procedures were approved by the animal care committee of  
86 the University of Ottawa and adhered to the guidelines established by the Canadian Council on  
87 Animal Care for the use of animals in research.

88

### 89 *Catheterizations*

90 Fish were fasted for at least 24 h before surgery. They were anesthetized with ethyl-N-  
91 aminobenzoate sulfonic acid (MS-222; 60 mg L<sup>-1</sup>) in well oxygenated water. The animals used  
92 to measure lactate kinetics were doubly cannulated in the dorsal aorta using PE-50 catheters  
93 (Intramedic, Clay-Adams, Sparks, MD, USA), as detailed in (Haman and Weber, 1996). The  
94 catheters were kept patent by flushing with Cortland saline (Wolf, 1963) containing 50 U ml<sup>-1</sup>  
95 heparin (Sigma-Aldrich, St-Louis, MO, USA). Only animals with a hematocrit >20% after  
96 recovery from surgery were used in tracer experiments. For the sham-catheterized group, the  
97 two catheters were sutured to the palate, but they were not inserted in the dorsal aorta. The aim  
98 of sham-catheterization was to produce the same hydrodynamic drag experienced during actual  
99 tracer experiments, but without affecting the vasculature or drawing blood samples.

100

### 101 *Swim tunnel respirometry*

102 All experiments were carried out at 13°C in a 90 l swim tunnel respirometer (Loligo  
103 Systems, Tjele, Denmark) filled with the same quality water as the holding tank. A  
104 “honeycomb” grid was placed before the swimming chamber to promote laminar flow. The  
105 fish always swam in the anterior part of the chamber (kept dark) to avoid the posterior part  
106 (brightly lit). The swim tunnel was calibrated with a flow probe (Global Water Geotech,  
107 Denver, CO, USA) to establish the linear relationship between water velocity (in cm/s) and  
108 motor speed (in RPM). Swimming speeds were corrected for solid blocking as in (Claireaux et  
109 al., 2006). Metabolic rate (MO<sub>2</sub>) was measured by intermittent flow respirometry using  
110 galvanic oxygen probes connected to a DAQ-PAC-G1 instrument controlled with AutoResp<sup>TM</sup>  
111 software (ver. 2; Loligo Systems). The oxygen probes were calibrated before measurements  
112 using N<sub>2</sub>-saturated water (0% O<sub>2</sub>) and air-saturated water (20.9% O<sub>2</sub>). Before experiments,  
113 each fish was placed in the swim tunnel overnight for acclimation to the experimental setup.  
114 During this period, water velocity was kept at 0.5 BL s<sup>-1</sup>, a low speed requiring no swimming

115 but enabling the fish to rest at the bottom of the respirometer. Critical swimming speed ( $U_{crit}$ )  
116 and the effects of graded exercise on  $MO_2$ , cost of transport and lactate kinetics were  
117 quantified using a stepwise  $U_{crit}$  protocol (Jain et al., 1997) with velocity increments of 0.2 BL  
118  $s^{-1}$  every 20 min. Graded swimming experiments were terminated at exhaustion when the fish  
119 was unable to remove itself from the rear grid.

120

### 121 *Lactate kinetics*

122 The catheters were made accessible through the swim tunnel lid by channeling them  
123 through a water-tight port. The rates of lactate appearance ( $R_a$ ) and lactate disposal ( $R_d$ ) were  
124 measured by continuous infusion of [ $U-^{14}C$ ] lactate (New England Nuclear, Boston, MA,  
125 USA; 4.84 GBq  $mmol^{-1}$ ). Infusates were freshly prepared immediately before each experiment  
126 by drying an aliquot of the solution obtained from the supplier under  $N_2$  and resuspending in  
127 Cortland saline. Labeled lactate was infused for 1 h in resting fish to quantify baseline lactate  
128 kinetics. It was administered at a rate of  $2029 \pm 227$  Bq  $kg^{-1} min^{-1}$  (N=15) using a calibrated  
129 syringe pump (Harvard Apparatus, South Natick, MA, USA) at 1 ml  $h^{-1}$ . Under these  
130 conditions, isotopic steady-state is reached in <45 min (Omlin and Weber, 2010). Lactate  
131 (labelled+unlabelled) was infused at rates accounting for <0.002% of the endogenous  $R_a$   
132 lactate measured in resting fish. Tracer infusion was continued either for 4-5 h to complete a  
133  $U_{crit}$  protocol (graded exercise experiments) or for 2 h at 1.7 BL  $s^{-1}$  (steady-state exercise  
134 experiments). The water was kept normoxic throughout the measurements ( $10.64 \pm 0.07$  mg  
135  $O_2 l^{-1}$ ). Blood samples (100  $\mu l$  each) were drawn at the end of the initial resting period and at  
136 regular intervals during swimming (5 min before each stepwise velocity increment for graded  
137 exercise and every 10 min for steady-state exercise). The total amount of blood sampled from  
138 each fish accounted for <10% of blood volume. Samples were immediately deproteinized in  
139 200  $\mu l$  perchloric acid (6% w/w) and centrifuged for 5 min at 16,000 G (Eppendorf 5415C,  
140 Brinkmann, Rexdale, Canada). Supernatants were kept frozen at  $-20^\circ C$  until analyses.

141

### 142 *Sample analyses*

143 Blood lactate concentration was measured spectrophotometrically (Bergmeyer, 1985)  
144 using a Spectra Max plus 384 (Molecular Devices, Sunnyvale, CA, USA). To measure  
145 activity, lactate was separated using ion exchange columns as described in (Omlin and Weber,

146 2010). Before passing through the columns, each deproteinized blood sample was neutralized  
 147 with 1 M potassium bicarbonate and diluted with 5 ml deionized H<sub>2</sub>O. Preliminary  
 148 experiments with known amounts of labeled lactate showed that 70% of total activity was  
 149 recovered, and measured lactate activities were corrected accordingly. Radioactivity was  
 150 measured by scintillation counting (Beckman Coulter LS 6500, Fullerton, CA, USA) in Bio-  
 151 Safe II scintillation fluid (RPI Corp, Mount Prospect, IL, USA).

152

### 153 *Calculations and statistics*

154 Critical swimming speed ( $U_{crit}$  in BL s<sup>-1</sup>) was calculated according to (Brett, 1964):

155

$$156 \quad U_{crit} = V_f + [(t_f/t_i) \times V_i]$$

157

158 Where  $V_f$  was the highest speed at which a full time interval was completed (in BL s<sup>-1</sup>),  $V_i$  was  
 159 the speed increment between intervals (0.2 BL s<sup>-1</sup>),  $T_f$  was the time spent swimming during the  
 160 last interval causing exhaustion (in min), and  $T_i$  was the full interval (20 min). The amount of  
 161 energy needed to transport one unit body mass by one unit distance, or total cost of transport  
 162 (TCOT) (Schmidt-Nielsen, 1972) was calculated from total MO<sub>2</sub> as follows:

163

$$164 \quad \text{TCOT} = \text{total MO}_2 / U$$

165

166 Where TCOT is in  $\mu\text{mol O}_2 \text{ kg}^{-1} \text{ m}^{-1}$ , MO<sub>2</sub> is the metabolic rate in  $\mu\text{mol O}_2 \text{ kg}^{-1} \text{ min}^{-1}$ , and U is  
 167 the swimming speed in m min<sup>-1</sup>. The net cost of transport (NCOT) was calculated similarly,  
 168 but from net MO<sub>2</sub> defined as swimming MO<sub>2</sub> minus resting MO<sub>2</sub>. Resting MO<sub>2</sub> was obtained  
 169 by averaging the ten lowest values recorded during the night preceding the exercise  
 170 measurements. The rates of lactate appearance ( $R_a$ ) and disposal ( $R_d$ ) were calculated using the  
 171 non-steady state equations of Steele (Steele, 1959). Statistical comparisons were performed  
 172 using one- or two-way repeated measures analysis of variance (RM ANOVA) with Dunnett's  
 173 post-hoc test to determine which means were different from baseline, or Holm-Sidak test to  
 174 compare treatments (SigmaPlot v.12, Systat Software, Inc., San Jose, CA, USA). When the  
 175 assumptions of normality (Shapiro-Wilk test) or homoscedasticity (Levene test) were not met,  
 176 Friedman RM ANOVA on ranks was used or the data were normalized by log<sub>10</sub> transformation

177 before parametric analysis. All values presented are means  $\pm$  s.e.m and  $P < 0.05$  was used as  
178 level of significance in all tests.

179

## 180 RESULTS

181

### 182 1. Graded swimming

#### 183 *Metabolic rate*

184 Resting rates of oxygen consumption were not different between treatments ( $P > 0.05$ ;  
185 Table 1). Metabolic rate increased progressively with swimming speed and was higher than  
186 resting  $MO_2$  at all speeds ( $P < 0.001$ ; Fig. 1A). The exercise-induced increase in  $MO_2$  was not  
187 significantly different between groups ( $P > 0.05$ ). The highest  $MO_2$  was reached at the end of  
188 the graded exercise protocol (Table 1). Two individuals of the control group were able to  
189 reach the highest swimming speed of  $3.6 \text{ BL s}^{-1}$  (Fig. 1A). Figure 1B shows changes in  $MO_2$   
190 as a function of exercise intensity expressed as  $\%U_{crit}$ . The 3 treatments were not different  
191 from each other ( $P > 0.05$ ) and the pooled data were fitted with a polynomial regression of  
192 second order ( $P < 0.001$ ,  $r^2 = 0.72$ ):  $MO_2 = 109.136 - 1.669 (\%U_{crit}) + 0.0285 (\%U_{crit})^2$ .

193

#### 194 *Cost of transport and $U_{crit}$*

195 Across speeds, treatment groups had the same TCOT ( $P = 0.28$ ; Fig. 2A), but a different  
196 NCOT ( $P < 0.01$ ; Fig. 2B). Maximum TCOT was measured at the lowest swimming speed of  
197  $0.8 \text{ BL s}^{-1}$  for all groups (Fig. 2A). As exercise intensity was increased, TCOT became lower  
198 than maximal values for all swimming speeds above  $1 \text{ BL s}^{-1}$  ( $P < 0.001$ ). Averaged among  
199 groups, TCOT decreased from a maximum of  $5.4 \mu\text{mol O}_2 \text{ kg}^{-1} \text{ m}^{-1}$  at  $0.8 \text{ BL s}^{-1}$  to a minimum  
200 of  $3.1 \mu\text{mol O}_2 \text{ kg}^{-1} \text{ m}^{-1}$  at  $2.2 \text{ BL s}^{-1}$ . NCOT was also affected by exercise intensity (Fig. 2B)  
201 and was higher between  $2.4$  and  $3.2 \text{ BL s}^{-1}$  than for the lowest swimming speed ( $P < 0.01$ ).  
202 Treatments had a significant effect on  $U_{crit}$  ( $P < 0.05$ ; Fig. 3) that was highest in controls ( $3.4$   
203  $\text{BL s}^{-1}$ ), intermediate in sham-catheterized ( $3.1 \text{ BL s}^{-1}$ ), and lowest for lactate kinetics ( $2.8 \text{ BL}$   
204  $\text{s}^{-1}$ ). Minimum TCOT was the same for all treatments ( $P > 0.05$ ), but occurred at different  
205 swimming speeds. Minimal NCOT was not different between controls and sham-catheterized  
206 ( $P > 0.05$ ), but it was higher for sham-catheterized than for lactate kinetics ( $P < 0.05$ ). Minimal



207 TCOT was measured at higher swimming speeds (2.0-2.4 BL s<sup>-1</sup>) than minimal NCOT (1.0-1.2  
208 BL s<sup>-1</sup>).

209

### 210 *Effects of exercise intensity on lactate metabolism*

211 Swimming speed was progressively increased over 4 h, following a classic stepwise U<sub>crit</sub>  
212 protocol (Fig. 4A). Both, R<sub>a</sub> lactate (P<0.001) and R<sub>d</sub> lactate (P<0.01) were strongly  
213 stimulated over time as exercise intensity increased (Fig. 4B). Mean R<sub>a</sub> lactate values above  
214 2.4 BL s<sup>-1</sup> (or above 85% U<sub>crit</sub>) were higher than baseline (P<0.05). R<sub>a</sub> lactate increased from a  
215 baseline level of 24.2 μmol kg<sup>-1</sup> min<sup>-1</sup> to a maximum of 40.4 μmol kg<sup>-1</sup> min<sup>-1</sup>. R<sub>d</sub> lactate  
216 increased from 24.6 to a maximum of 34.7 μmol kg<sup>-1</sup> min<sup>-1</sup>. Lactate concentration increased  
217 from a baseline value of 1.3 mM to a maximum of 5.1 mM with exercise intensity (P<0.001;  
218 Fig. 4C). Mean blood lactate concentrations for speeds above 2.0 BL/s were higher than  
219 baseline (P<0.05).

220

## 221 **2. Steady-state swimming**

### 222 *Metabolic rate*

223 The first 60 min were monitored at rest to quantify baseline lactate kinetics. The  
224 transition from rest to steady-state swimming was made progressively over 30 min before  
225 maintaining a constant speed of 1.7 BL s<sup>-1</sup> for 90 min (Fig. 5A). Metabolic rate increased from  
226 resting levels of ~80 μmol O<sub>2</sub> kg<sup>-1</sup> min<sup>-1</sup> to a maximum of 126.8 μmol O<sub>2</sub> kg<sup>-1</sup> min<sup>-1</sup> after 40  
227 min of exercise (Fig. 5B). MO<sub>2</sub> was maintained above resting values between 40 and 80 min  
228 (P<0.05) before declining to 99.9 μmol O<sub>2</sub> kg<sup>-1</sup> min<sup>-1</sup> over the last 30 min.

229

### 230 *Steady exercise and lactate metabolism*

231 Blood lactate concentration increased from a resting value of 0.7 to ~1.4 mM during the  
232 first 30 min of steady swimming at 1.7 BL/s, and stayed at that level until the end of the  
233 experiment (P<0.05; Fig. 6A). Both, R<sub>a</sub> and R<sub>d</sub> lactate increased over time (P<0.001; Fig. 6B)  
234 from baseline values of 22.4 μmol kg<sup>-1</sup> min<sup>-1</sup> (R<sub>a</sub>) and 23.7 (R<sub>d</sub>) to maximal levels of 30.9 (R<sub>a</sub>)  
235 and 29.8 (R<sub>d</sub>). Mean R<sub>a</sub> and R<sub>d</sub> lactate were higher than baseline between 30 and 50 min of  
236 steady-state swimming (P<0.05), but returned to resting values for the last 60 min of exercise  
237 (P>0.05).

238

239 **DISCUSSION**

240 This study is the first to characterize the relationship between exercise intensity and  
241 lactate kinetics in an ectotherm. It shows that the lactate fluxes of rainbow trout are stimulated  
242 at speeds greater than  $2.4 \text{ BL s}^{-1}$  (or  $\sim 85\% U_{\text{crit}}$ ), when lactate production starts diverging from  
243 lactate disposal. At these high exercise intensities, the change in  $R_a$  lactate stops being matched  
244 by the increase in  $R_d$  lactate, leading to a significant accumulation of glycolytic end product in  
245 the circulation. By contrast, steady-state submaximal exercise causes  $R_a$  and  $R_d$  lactate to  
246 increase similarly from  $\sim 20$  to  $\sim 30 \mu\text{mol kg}^{-1} \text{ min}^{-1}$ , with a trivial mismatch between  
247 production and disposal that only affects blood concentration minimally (from 0.7 to 1.4 mM).  
248 Earlier measurements by bolus injection had underestimated true lactate fluxes, but the same  
249 relative effect of steady, low-intensity swimming was observed (Weber, 1991). Present results  
250 show that catheterization has no impact on metabolic rate and cost of transport below  $85\%$   
251  $U_{\text{crit}}$ . At these submaximal speeds, swimming energetics are not affected by the catheters or by  
252 sampling blood, and, therefore, all the parameters of metabolite kinetics measured by  
253 continuous tracer infusion also apply to non-instrumented fish. Above  $85\% U_{\text{crit}}$ ,  
254 catheterization increases NCOT, and direct comparisons between intact and instrumented  
255 animals swimming at the same speed should be made with caution.

256

257 ***Lactate production during swimming***

258 Below  $85\% U_{\text{crit}}$ , swimming has no effect on  $R_a$  and  $R_d$  lactate of rainbow trout (Fig. 4).  
259 At higher speeds, glycolysis is sharply stimulated, causing an increase in lactate production  
260 from 24 to  $40 \mu\text{mol kg}^{-1} \text{ min}^{-1}$  (Fig. 4B). This 67% rise in  $R_a$  lactate was measured at the  
261 highest speed allowing metabolite flux measurements in a swimming fish. Trout may be able  
262 to upregulate  $R_a$  lactate more strongly than reported here because previous studies suggest  
263 several-fold changes for flounder, salmon and catfish between rest and recovery from  
264 exhausting exercise (Cameron and Cech Jr., 1990; Milligan and McDonald, 1988). However,  
265 these fluxes measured post-exercise were estimated by bolus injection and may need to be  
266 confirmed with more reliable methods.

267

268 The stimulation of lactate flux is stronger in mammals than in trout because  
269 submaximal exercise induces a 6-fold increase in dogs (Issekutz Jr et al., 1976), thoroughbred  
270 horses (Weber et al., 1987), and humans (Bergman et al., 1999). Moreover, humans can  
271 increase lactate production by 22-fold over resting values during a graded exercise protocol  
272 similar to what was used here for fish (Stanley et al., 1985). Trout may only be able to show a  
273 modest relative increase in flux because their metabolic scope is much smaller than in  
274 mammals (Brett, 1972). Also, greater stimulation of lactate fluxes may not be possible for trout  
275 because their baseline levels could already be quite high. This notion is supported by the fact  
276 that the  $R_a$  lactate/ $MO_2$  ratios of trout and humans are similar during intense exercise (8.9 for  
277 trout vs 6.4 for humans), but much higher in resting trout (19.5) than in resting humans (only  
278 2.9)(Stanley et al., 1985; this study).

279

### 280 *Intense exercise stimulates lactate disposal*

281 Above 85%  $U_{crit}$ ,  $R_d$  lactate increases by 41% (Fig. 4B). Without this response,  
282 circulating lactate would reach twice the concentration actually observed at the end of exercise  
283 (Fig. 4C). Therefore, increasing the rate of lactate disposal during intense swimming plays an  
284 important role in reducing the lactate load on the circulation, a metabolic strategy previously  
285 noticed during exposure to hypoxia (Fig. 5 in Omlin and Weber, 2010). Such a response is  
286 rather surprising at a time when anaerobic glycolysis is stimulated. As the only two pathways  
287 available for lactate clearance, how could *gluconeogenesis* and/or *oxidation* contribute to the  
288 increase in  $R_d$  lactate? The effects of swimming on gluconeogenesis have never been measured  
289 directly in fish, but several tracer studies suggest that this pathway is not stimulated by  
290 exercise (Moyes and West, 1995). Hepatic glucose production actually decreases during  
291 submaximal swimming, but it is unclear whether gluconeogenesis or glycogenolysis are  
292 responsible for this decline (Shanghavi and Weber, 1999). Intuitively, stimulating  
293 gluconeogenesis during swimming would seem undesirable because glucose synthesis is  
294 energetically costly (6 ATP/glucose (Clark et al., 1974)). Overall, current information suggests  
295 that the stimulation of lactate disposal reported here is not accounted for by gluconeogenesis,  
296 but by an increase in lactate oxidation. Highly aerobic tissues like heart, red muscle, kidney  
297 and brain can readily use lactate as an oxidative fuel (Bilinski and Jonas, 1972; Soengas and  
298 Aldegunde, 2002) and they are probably responsible for increasing lactate clearance during

299 exercise. For example, perfused trout heart experiments show that lactate oxidation is  
300 stimulated when cardiac work or lactate availability become elevated (Lanctin et al., 1980;  
301 Milligan and Farrell, 1991). In addition, important physiological roles for various lactate  
302 shuttles have been demonstrated in mammals (Brooks, 1998; Gladden, 2004). Exercising fish  
303 may also rely on lactate shuttles to transport the end product from white muscle to aerobic  
304 tissues for oxidation. In trout, however, intertissue lactate shuttles may be constrained by white  
305 muscle lactate retention: a phenomenon that has intrigued fish biologists for decades (Turner  
306 and Wood, 1983; Wang et al., 1997). We have recently demonstrated that white muscle has a  
307 very limited capacity to export lactate because this tissue shows minimal expression of  
308 monocarboxylate transporters (MCTs), even after exercise (Omlin and Weber, 2013).  
309 Presumably,  $R_d$  lactate could be stimulated a lot more than observed here during exercise if  
310 white muscle expressed MCTs at the higher levels prevalent in mammalian glycolytic fibers.  
311 The spatial separation of fish white and red muscles also precludes the intramuscular lactate  
312 shuttle between adjacent glycolytic and oxidative fibers well characterized within mixed  
313 mammalian muscles (Brooks, 1998; van Hall, 2000) .

314

### 315 ***Previous experiments by bolus injection underestimated lactate fluxes***

316 Continuous tracer infusion is the preferred method to quantify *in vivo* metabolite fluxes  
317 accurately in humans and animals (Wolfe, 1992). Its application to fish (this study; Omlin and  
318 Weber, 2010) shows that the lactate fluxes of rainbow trout are ~3 times higher than  
319 previously estimated by bolus injection (Weber, 1991). This is because the bolus injection  
320 method relies on problematic estimates of surface areas to calculate flux (flux = dose injected /  
321 surface area under the specific activity decay curve). Overestimation of surface area under the  
322 decay curve can happen for a number of reasons: (1) curve fitting for early sampling points is  
323 extremely inaccurate because specific activity changes very rapidly just after the injection of  
324 the bolus, (2)  $^{14}\text{C}$  recycling can artificially increase specific activities in the right hand side of  
325 the decay curve (later sampling times), and (3) a single catheter is used for bolus injection of  
326 the tracer and subsequent blood sampling; therefore, residual bolus activity on the catheter  
327 walls can increase specific activity in sampled blood by contamination. Finally, the bolus  
328 injection technique assumes steady state conditions, and each experiment only yields a single  
329 measurement of flux: two important restrictions that do not apply to continuous tracer infusion.

330 For all these reasons, bolus injection has been virtually abandoned as a practical tool to  
331 quantify metabolite kinetics.

332

### 333 *Effects of catheters and blood sampling on swimming performance*

334 We have tested whether applying the continuous tracer infusion technique has an  
335 impact on key physiological indices of performance:  $MO_2$ , TCOT, NCOT and  $U_{crit}$ . TCOT and  
336 NCOT were quantified separately because they are both helpful, but in different contexts. For  
337 example, TCOT is useful to determine the cost of migration. By contrast, NCOT only takes  
338 into account the energy used to power movement and excludes maintenance costs incurred by  
339 all tissues including muscle. In biomechanics, NCOT is particularly useful to quantify the  
340 efficiency of muscle contraction. It has been shown that instrumenting aquatic animals with  
341 catheters, tracking systems, or individual markers can affect locomotion energetics (Bannasch  
342 et al., 1994; Culik and Wilson, 1991; Gauthier–Clerc et al., 2004). However, these devices  
343 only impact locomotion at high speeds because hydrodynamic drag forces increase with the  
344 square of velocity (Biewener, 2003). In this study, we have quantified the cost of transport  
345 from measured rates of oxygen consumption, but have ignored the contribution of anaerobic  
346 metabolism. To estimate the potential error introduced by this approach, we have calculated  
347 the relative importance of anaerobic compared to aerobic metabolism at the highest swimming  
348 speed for which lactate kinetics could be measured. Assuming that carbohydrate was the only  
349 fuel consumed and that  $R_d$  lactate was either completely oxidized or not oxidized at all, we  
350 have determined a range of potential errors. At 2.8 BL/s, metabolic rate was  $202 \mu\text{mol O}_2 \text{ kg}^{-1}$   
351  $\text{min}^{-1}$  (Fig. 1A), or  $33.7 \mu\text{mol glucose kg}^{-1} \text{ min}^{-1}$ , or  $1212 \mu\text{mol ATP kg}^{-1} \text{ min}^{-1}$ . If 100% of  $R_d$   
352 lactate was oxidized, anaerobic metabolism would be  $5.7 \mu\text{mol lactate kg}^{-1} \text{ min}^{-1}$  (=net lactate  
353 production= $R_a$  lactate -  $R_d$  lactate; Fig. 4B) or  $11.4 \mu\text{mol ATP kg}^{-1} \text{ min}^{-1}$ , and would only  
354 account for <1% of aerobic metabolism (=11.4/1212). If 0% of  $R_d$  lactate was oxidized (a  
355 very unlikely scenario), anaerobic metabolism would be  $40.4 \mu\text{mol lactate kg}^{-1} \text{ min}^{-1}$  (=  $R_a$   
356 lactate) or  $80.8 \mu\text{mol ATP kg}^{-1} \text{ min}^{-1}$ , and would account for 6.7% of aerobic metabolism  
357 (=80.8/1212). Therefore, cost of transport could have been underestimated by 1 to 6.7% at the  
358 highest swimming speed. Results show that two catheters exiting from the snout of the fish do  
359 not significantly increase  $MO_2$  or TCOT at any swimming speed tested in our study (Figs. 1  
360 and 2). However, catheterized animals have a higher NCOT than non-instrumented controls

361 (+21% for sham catheterized and +29% for lactate kinetics) when they travel faster than 2.4  
362  $\text{BL s}^{-1}$ , and their  $U_{\text{crit}}$  is reduced (Figs. 2B and 3A). The higher NCOT observed in  
363 instrumented animals is not due to differences in resting  $\text{MO}_2$  because catheterization has no  
364 effect on this parameter (Table 1), indicating that the stress of surgery is very low. All  
365 metabolite fluxes previously measured by continuous tracer infusion in swimming fish were  
366 not influenced by double catheterization because the experiments were performed at low,  
367 sustainable speeds ( $<1.5 \text{ BL s}^{-1}$ ) and NCOT is only affected above  $2.4 \text{ BL s}^{-1}$  (Bernard et al.,  
368 1999; Magnoni et al., 2008; Shanghavi and Weber, 1999).

369

370 In rainbow trout, the relationship between cost of transport and swimming speed is U-  
371 shaped (Fig. 2A), as predicted by various models derived exclusively from hydrodynamic  
372 theory (Pettersson and Hedenström, 2000; Wakeman and Wohlschlag, 1981). This finding is  
373 highly consistent with empirical observations made in other fish species including European  
374 sea bass (Claireaux et al., 2006), Atlantic cod (Syme et al., 2008), Pacific bonito (Sepulveda et  
375 al., 2003), several flatfish (Duthie, 1982), and zebrafish (Palstra et al., 2010). Here, optimal  
376 swimming speed ( $U_{\text{opt}}$  = speed with minimal cost of transport) was  $2.1 \text{ BL s}^{-1}$  for TCOT (Fig.  
377 2A) and  $1.1 \text{ BL s}^{-1}$  for NCOT (Fig. 2B). This interesting difference has been commonly  
378 reported in the fish literature. It indicates that maximal aerobic efficiency (Webb, 1971) is  
379 achieved at  $\sim 70\% U_{\text{crit}}$ , whereas maximal muscle efficiency occurs at  $\sim 30\text{-}40\% U_{\text{crit}}$  (Luna-  
380 Acosta et al., 2011; Palstra et al., 2008; Palstra et al., 2010).

381

382 Critical swimming speed was significantly reduced by the experimental manipulations  
383 necessary to measure metabolite kinetics. On their own, the drag forces elicited by the two  
384 catheters decreased  $U_{\text{crit}}$  by 11%. When the stress of sampling blood was added to this  
385 mechanical interference,  $U_{\text{crit}}$  was further decreased by 6% (-17% compared to non-  
386 instrumented controls)(Fig. 3A), possibly through a reduction in oxygen transport. Another  
387 study reported no effect of cannulation on  $U_{\text{crit}}$  (Butler et al., 1992), but the measurements were  
388 made on brown trout implanted with a single catheter that may have caused less drag than the  
389 two catheters of our experiments. It may also be easier to demonstrate significant effects of  
390 hydrodynamic drag in rainbow trout because they have a better swimming capacity ( $U_{\text{crit}}$  of  
391  $2.8\text{-}3.4 \text{ BL s}^{-1}$ ) than brown trout that are less athletic ( $U_{\text{crit}}$  of  $\sim 2.2 \text{ BL s}^{-1}$ )(Butler et al., 1992).

392

393 **Conclusions**

394 This study is the first to show how the lactate kinetics of an ectotherm change with  
395 exercise intensity, and quantifies the rates of lactate production and disposal in rainbow trout,  
396 from rest to  $U_{crit}$ . This aerobic species maintains high baseline lactate fluxes of  $24 \mu\text{mol kg}^{-1}$   
397  $\text{min}^{-1}$  that are only increased at speeds greater than  $2.4 \text{ BL s}^{-1}$  or  $\sim 85\% U_{crit}$ . When the fish  
398 accelerates to reach  $U_{crit}$ ,  $R_a$  lactate is more strongly stimulated than  $R_d$  lactate (+67% vs  
399 +41%) and this mismatch causes a 4-fold increase in blood lactate concentration. Without this  
400 stimulation of  $R_d$ , the accumulation of end product would double and impose an extra load on  
401 the circulation. Increased lactate oxidation by aerobic tissues (red muscle, heart, kidney and  
402 brain) is probably responsible for the higher  $R_d$  lactate observed during intense swimming.  
403 Results also show that the hydrodynamic drag from double catheterization and blood sampling  
404 needed to measure metabolite kinetics in swimming trout have no significant impact on  $\text{MO}_2$   
405 or TCOT. However, these experimental procedures affect locomotion energetics by increasing  
406 NCOT at speeds  $>2.4 \text{ BL s}^{-1}$  and by decreasing  $U_{crit}$ .

407

408 **Acknowledgements**

409 We thank Bill Fletcher and Christopher Lavergne for taking care of the animals.

410

411 **Funding**

412 This work was supported by grants from the Natural Sciences and Engineering  
413 Research Council of Canada to JMW (NSERC: Discovery; Research Tools and Instruments).

414 LT was the recipient of an International Mobility Fellowship from Région Rhône-Alpes

415 (France) and a Travel Fellowship from The Company of Biologists Ltd (UK).

416



## References

- Bannasch, R., Wilson, R. and Culik, B.** (1994). Hydrodynamic aspects of design and attachment of a back-mounted device in penguins. *J. Exp. Biol.* **194**, 83-96.
- Bergman, B. C., Wolfel, E. E., Butterfield, G. E., Lopaschuk, G. D., Casazza, G. A., Horning, M. A. and Brooks, G. A.** (1999). Active muscle and whole body lactate kinetics after endurance training in men. *J. Appl. Physiol.* **87**, 1684-1696.
- Bergmeyer, H. U.** (1985). *Methods of Enzymatic Analysis*, pp. 701: Weinheim: VCH.
- Bernard, S. F., Reidy, S. P., Zwingelstein, G. and Weber, J.-M.** (1999). Glycerol and fatty acid kinetics in rainbow trout: effects of endurance swimming. *J. Exp. Biol.* **202**, 279-88.
- Biewener, A. A.** (2003). *Animal locomotion*. New York: Oxford University Press.
- Bilinski, E. and Jonas, R. E. E.** (1972). Oxidation of Lactate to Carbon Dioxide by Rainbow Trout (*Salmo gairdneri*) Tissues. *J. Fish. Res. Bd. Can.* **29**, 1467-1471.
- Brett, J.** (1964). The respiratory metabolism and swimming performance of young sockeye salmon. *J. Fish. Res. Bd. Can.* **21**, 1183-1226.
- Brett, J. R.** (1972). The metabolic demand for oxygen in fish, particularly salmonids, and a comparison with other vertebrates. *Resp. Physiol.* **14**, 151-170.
- Brooks, G. A.** (1991). Current concepts in lactate exchange. *Med. Sci. Sports Exer.* **23**, 895-906.
- Brooks, G. A.** (1998). Mammalian fuel utilization during sustained exercise. *Comp. Biochem. Physiol.* **120B**, 89-107.
- Butler, P., Day, N. and Namba, K.** (1992). Interactive effects of seasonal temperature and low pH on resting oxygen uptake and swimming performance of adult brown trout *Salmo trutta*. *J. Exp. Biol.* **165**, 195.
- Cameron, J. N. and Cech Jr., J. J.** (1990). Lactate kinetics in exercised channel catfish, *Ictalurus punctatus*. *Physiol. Zool.* **63**, 909-920.
- Claireaux, G., Couturier, C. and Groison, A.-L.** (2006). Effect of temperature on maximum swimming speed and cost of transport in juvenile European sea bass (*Dicentrarchus labrax*). *J. Exp. Biol.* **209**, 3420-3428.
- Clark, M. G., Bloxham, D. P., Holland, P. C. and Lardy, H. A.** (1974). Estimation of the fructose 1,6-diphosphatase-phosphofructokinase substrate cycle and its relationship to gluconeogenesis in rat liver in vivo. *J. Biol. Chem.* **249**, 279-90.
- Culik, B. and Wilson, R. P.** (1991). Swimming Energetics and Performance of Instrumented Adélie Penguins (*Pygoscelis Adeliae*). *J. Exp. Biol.* **158**, 355-368.
- Donovan, C. M. and Brooks, G. A.** (1983). Endurance training affects lactate clearance, not lactate production. *Am. J. Physiol.* **244**, E83-E92.
- Duthie, G. G.** (1982). The respiratory metabolism of temperature-adapted flatfish at rest and during swimming activity and the use of anaerobic metabolism at moderate swimming speeds. *J. Exp. Biol.* **97**, 359-373.
- Farrell, A. P.** (2008). Comparisons of swimming performance in rainbow trout using constant acceleration and critical swimming speed tests. *J. Fish Biol.* **72**, 693-710.
- Gauthier-Clerc, M., Gendner, J.-P., Ribic, C. A., Fraser, W. R., Woehler, E. J., Descamps, S., Gilly, C., Le Bohec, C. and Le Maho, Y.** (2004). Long-term effects of flipper bands on penguins. *Proc. Royal Soc. London. B* **271**, S423-S426.
- Gladden, L. B.** (2004). Lactate metabolism: a new paradigm for the third millennium. *J. Physiol. (London)* **558**, 5-30.
- Haman, F., Powell, M. and Weber, J.-M.** (1997). Reliability of continuous tracer infusion for measuring glucose turnover rate in rainbow trout. *J. Exp. Biol.* **200**, 2557-2563.

- Haman, F. and Weber, J.-M.** (1996). Continuous tracer infusion to measure in vivo metabolite turnover rates in trout. *J. Exp. Biol.* **199**, 1157-1162.
- Issekutz Jr, B., Shaw, W. and Issekutz, A.** (1976). Lactate metabolism in resting and exercising dogs. *J. Appl. Physiol.* **40**, 312-319.
- Jain, K., Hamilton, J. and Farrell, A.** (1997). Use of a ramp velocity test to measure critical swimming speed in rainbow trout (*Onchorhynchus mykiss*). *Comp. Biochem. Physiol. A* **117**, 441-444.
- Lanctin, H. P., McMorran, L. E. and Driedzic, W. R.** (1980). Rates of glucose and lactate oxidation by the perfused isolated trout (*Salvelinus fontinalis*) heart. *Can. J. Zool.* **58**, 1708-1711.
- Luna-Acosta, A., Lefrançois, C., Millot, S., Chatain, B. and Bégout, M. L.** (2011). Physiological response in different strains of sea bass (*Dicentrarchus labrax*): Swimming and aerobic metabolic capacities. *Aquaculture* **317**, 162-167.
- Magnoni, L., Vaillancourt, E. and Weber, J.-M.** (2008). High resting triacylglycerol turnover of rainbow trout exceeds the energy requirements of endurance swimming. *Am. J. Physiol.* **295**, R309-R315.
- Milligan, C. L. and Farrell, A. P.** (1991). Lactate utilization by an *in situ* perfused trout heart: effects of workload and blockers of lactate transport. *J. Exp. Biol.* **155**, 357-373.
- Milligan, C. L. and McDonald, D. G.** (1988). *In vivo* lactate kinetics at rest and during recovery from exhaustive exercise in Coho salmon (*Oncorhynchus kisutch*) and starry flounder (*Platichthys stellatus*). *J. Exp. Biol.* **135**, 119-131.
- Moyes, C. D. and West, T. G.** (1995). Exercise metabolism of fish. *Biochemistry and molecular biology of fishes* **4**, 367-392.
- Omlin, T. and Weber, J.-M.** (2010). Hypoxia stimulates lactate disposal in rainbow trout. *J. Exp. Biol.* **213**, 3802-3809.
- Omlin, T. and Weber, J.-M.** (2013). Exhausting exercise and tissue-specific expression of monocarboxylate transporters in rainbow trout. *Am. J. Physiol.* **304**, R1036-R1043.
- Palstra, A., van Ginneken, V. and van den Thillart, G.** (2008). Cost of transport and optimal swimming speed in farmed and wild European silver eels (*Anguilla anguilla*). *Comp. Biochem. Physiol. A* **151**, 37-44.
- Palstra, A. P., Tudorache, C., Rovira, M., Brittijn, S. A., Burgerhout, E., van den Thillart, G. E. E. J. M., Spink, H. P. and Planas, J. V.** (2010). Establishing Zebrafish as a Novel Exercise Model: Swimming Economy, Swimming-Enhanced Growth and Muscle Growth Marker Gene Expression. *PLoS ONE* **5**, e14483.
- Petterson, L. B. and Hedenström, A.** (2000). Energetics, cost reduction and functional consequences of fish morphology. *Proc. Royal Soc. London. B* **267**, 759-764.
- Philp, A., MacDonald, A. L. and Watt, P. W.** (2005). Lactate - a signal coordinating cell and systemic function. *J. Exp. Biol.* **208**, 4561-4575.
- Schmidt-Nielsen, K.** (1972). Locomotion: energy cost of swimming, flying, and running. *Science* **177**, 222-228.
- Sepulveda, C. A., Dickson, K. A. and Graham, J. B.** (2003). Swimming performance studies on the eastern Pacific bonito *Sarda chiliensis*, a close relative of the tunas (family *Scombridae*) I. Energetics. *J. Exp. Biol.* **206**, 2739-2748.
- Shanghavi, D. S. and Weber, J.-M.** (1999). Effects of sustained swimming on hepatic glucose production of rainbow trout. *J. Exp. Biol.* **202**, 2161-2166.
- Soengas, J. L. and Aldegunde, M.** (2002). Energy metabolism of fish brain. *Comp. Biochem. Physiol. B* **131**, 271-296.

- Stanley, W. C., Gertz, E. W., Wisneski, J. A., Morris, D. L., Neese, R. A. and Brooks, G. A.** (1985). Systemic lactate kinetics during graded exercise in man. *Am. J. Physiol.* **249**, E595-E602.
- Steele, R.** (1959). Influences of glucose loading and of injected insulin on hepatic glucose output. *Ann. NY Acad. Med. Sci.* **82**, 420-430.
- Syme, D. A., Gollock, M., Freeman, M. J. and Gamperl, A. K.** (2008). Power Isn't Everything: Muscle Function and Energetic Costs during Steady Swimming in Atlantic Cod (*Gadus morhua*). *Physiol. Biochem. Zool.* **81**, 320-335.
- Turner, J. D. and Wood, C. M.** (1983). Factors affecting lactate and proton efflux from pre-exercised, isolated-perfused rainbow trout trunks. *J. Exp. Biol.* **105**, 395-401.
- van Hall, G.** (2000). Lactate as a fuel for mitochondrial respiration. *Acta Physiol. Scand.* **168**, 643-656.
- van Hall, G., Jensen-Urstad, M., Rosdahl, H., Holmberg, H.-C., Saltin, B. and Calbet, J. A. L.** (2003). Leg and arm lactate and substrate kinetics during exercise. *Am. J. Physiol.* **284**, E193-E205.
- Wakeman, J. M. and Wohlschlag, D. E.** (1981). Least-cost swimming speeds and transportation costs in some pelagic estuarine fishes. *Fisheries Research* **1**, 117-127.
- Wang, Y., Wright, P. M., Heigenhauser, G. J. and Wood, C. M.** (1997). Lactate transport by rainbow trout white muscle: kinetic characteristics and sensitivity to inhibitors. *American Journal of Physiology - Regulatory, Integrative and Comparative Physiology* **272**, R1577-R1587.
- Webb, P. W.** (1971). The swimming energetics of trout. II. Oxygen consumption and swimming efficiency. *J. Exp. Biol.* **55**, 521-540.
- Weber, J.-M.** (1991). Effect of endurance swimming on the lactate kinetics of rainbow trout. *J. Exp. Biol.* **158**, 463-476.
- Weber, J.-M., Brill, R. W. and Hochachka, P. W.** (1986). Mammalian metabolite flux rates in a teleost: lactate and glucose turnover in tuna. *Am. J. Physiol.* **250**, R452-R458.
- Weber, J.-M., Parkhouse, W. S., Dobson, G. P., Harman, J. C., Snow, D. H. and Hochachka, P. W.** (1987). Lactate kinetics in exercising Thoroughbred horses: regulation of turnover rate in plasma. *Am. J. Physiol.* **253**, R896-R903.
- Wolf, K.** (1963). Physiological saline for fresh water teleosts. *Prog. Fish-Cult.* **25**, 135-140.
- Wolfe, R. R.** (1992). Radioactive and stable isotope tracers in biomedicine: Principles and practice of kinetic analysis. New York: Wiley-Liss.

## Figure legends

**Fig. 1.** Effects of graded swimming on the metabolic rate ( $\text{MO}_2$ ) of rainbow trout. Three groups of fish were measured: non-catheterized controls, sham catheterized, and catheterized animals during the measurement of lactate kinetics. Panel A shows  $\text{MO}_2$  as a function of swimming speed in BL/s. Values are means  $\pm$  s.e.m. For speeds  $< 3 \text{ BL s}^{-1}$ , sample sizes were  $N=6$  for controls and sham-catheterized, and  $N=8$  for the lactate kinetics group. Not all fish were able to swim at the higher speeds (where  $N<6$ ). \* indicates significant differences from resting values ( $P<0.001$ ). Panel B shows  $\text{MO}_2$  as a function of exercise intensity expressed as  $\%U_{\text{crit}}$ . The 3 treatments were not different from each other ( $p>0.05$ ). The thick line was fitted by polynomial regression of second order ( $P<0.001$ ,  $r^2=0.72$ ):  $\text{MO}_2=109.136 - 1.669 (\%U_{\text{crit}}) + 0.0285 (\%U_{\text{crit}})^2$ . Confidence intervals ( $\pm 99\%$ ) are also indicated by thin lines.

**Fig. 2.** Effects of graded swimming on the cost of transport (COT) in 3 groups of rainbow trout (non-catheterized controls, sham catheterized, and catheterized animals during the measurement of lactate kinetics). Only the statistical differences between treatment groups are indicated directly on the graph (but the effects of swimming speed are not). The Total COT (A) was not different between groups, but it was lower at all speeds above  $1 \text{ BL s}^{-1}$  than at the lowest speed ( $0.8 \text{ BL s}^{-1}$ ) for all groups ( $P<0.001$ ). Net COT is presented in panel B. Between  $2.4$  and  $3.2 \text{ BL s}^{-1}$ , it was lower in controls than in the other groups ( $P<0.01$ ) and it was higher than at  $0.8 \text{ BL s}^{-1}$  across groups ( $P<0.01$ ).

**Fig. 3.** Critical swimming speed ( $U_{\text{crit}}$ ) in 3 groups of exercising rainbow trout (non-catheterized controls, sham catheterized, and catheterized animals during the measurement of lactate kinetics). Values are means  $\pm$  s.e.m. ( $N=6$  for controls and sham-catheterized,  $N=7$  for lactate kinetics). The 3 treatments are different from each other ( $P< 0.05$ ).

**Fig. 4.** Effects of graded exercise on lactate metabolism in rainbow trout. (A) Changes in swimming speed, (B) lactate fluxes and (C) blood lactate concentration are indicated. Panel B shows the rates of lactate appearance ( $R_a$  lactate in red) and disposal ( $R_d$  lactate in green). Exercise was started at time 0 and tracer infusion at  $-60 \text{ min}$ . Values are means  $\pm$  s.e.m. (for

lactate fluxes, N=7 before 180 min, and N=4 and 2 for the last 2 points). \* indicates differences from first value ( $P<0.05$ ).

**Fig. 5.** (A) Changes in swimming speed and (B) metabolic rate ( $\text{MO}_2$ ) over time for rainbow trout during steady-state exercise experiments. Values are means  $\pm$  s.e.m. (N=7). \* indicates differences from resting  $\text{MO}_2$  ( $P<0.05$ ).

**Fig.6.** (A) Changes in blood lactate concentration and (B) lactate fluxes in rainbow trout during steady-state swimming at  $1.7 \text{ BL s}^{-1}$ . Panel B shows the rates of lactate appearance ( $R_a$  lactate in red) and disposal ( $R_d$  lactate in green). Values are means  $\pm$  s.e.m. (N=6). \* indicates differences from baseline at time 0 ( $P<0.05$ ).

**Table 1.** Morphological characteristics and metabolic rate ( $\text{MO}_2$ ) of rainbow trout in the different treatment groups. The same individuals were measured twice in random order for the control and sham-catheterized conditions. Sample size (N) is indicated on the first line, except for the highest  $\text{MO}_2$  measured where N is in parentheses (bottom line; because not all individuals within each group were able to reach the highest speed). Values are means  $\pm$  s.e.m.

|                                                                                              | Graded swimming     |                      |                     | Steady-state swimming |
|----------------------------------------------------------------------------------------------|---------------------|----------------------|---------------------|-----------------------|
|                                                                                              | Control             | Sham                 | Lactate kinetics    |                       |
| <b>N</b>                                                                                     | 6                   |                      | 8                   | 6                     |
| <b>Body mass (g)</b>                                                                         | 338.8 $\pm$ 14.7    |                      | 369.0 $\pm$ 10.1    | 487.6 $\pm$ 11.4      |
| <b>Body length (cm)</b>                                                                      | 32.4 $\pm$ 0.7      |                      | 33.6 $\pm$ 0.4      | 35.4 $\pm$ 0.4        |
| <b>Resting <math>\text{MO}_2</math> (<math>\mu\text{mol kg}^{-1} \text{min}^{-1}</math>)</b> | 64.7 $\pm$ 5.8      | 61.4 $\pm$ 4.6       | 57.4 $\pm$ 2.5      | -                     |
| <b>Highest <math>\text{MO}_2</math> (<math>\mu\text{mol kg}^{-1} \text{min}^{-1}</math>)</b> | 247.7 $\pm$ 1.2 (2) | 224.0 $\pm$ 38.7 (4) | 201.7 $\pm$ 9.5 (5) | -                     |

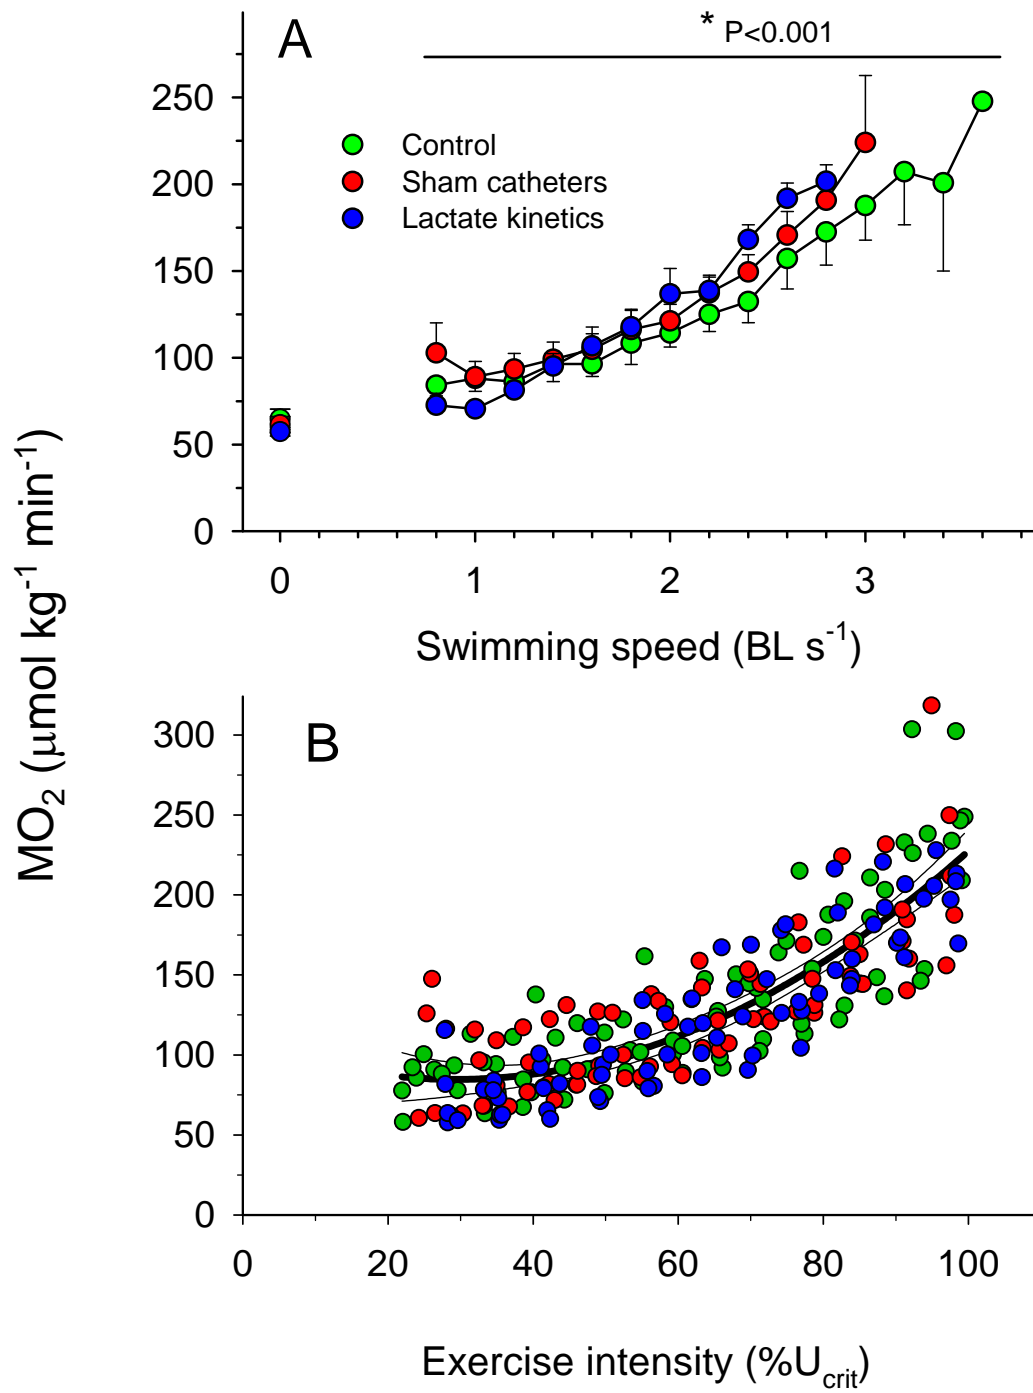

Fig. 1

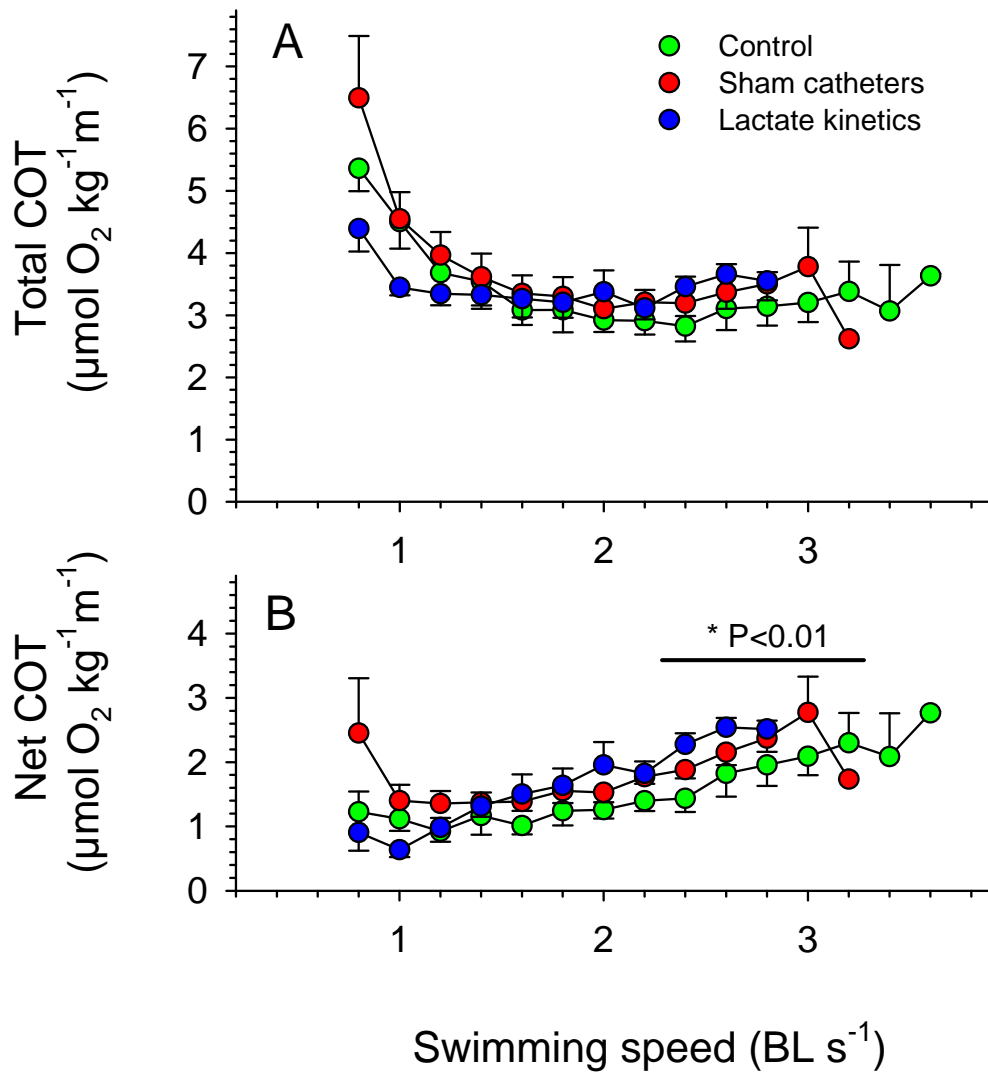

Fig. 2



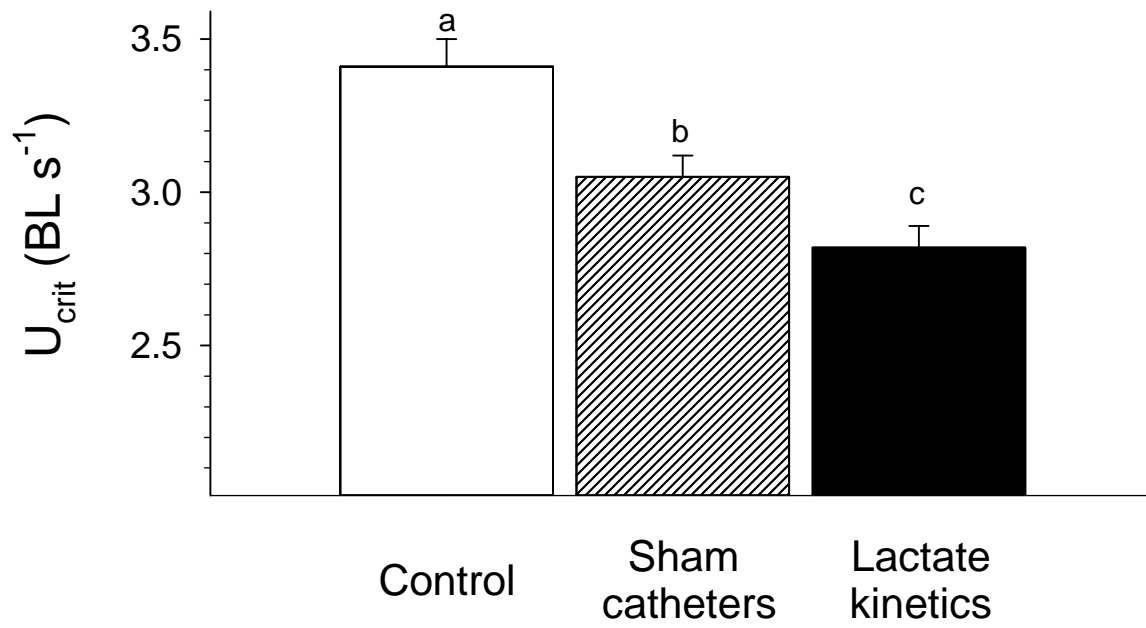

Fig 3

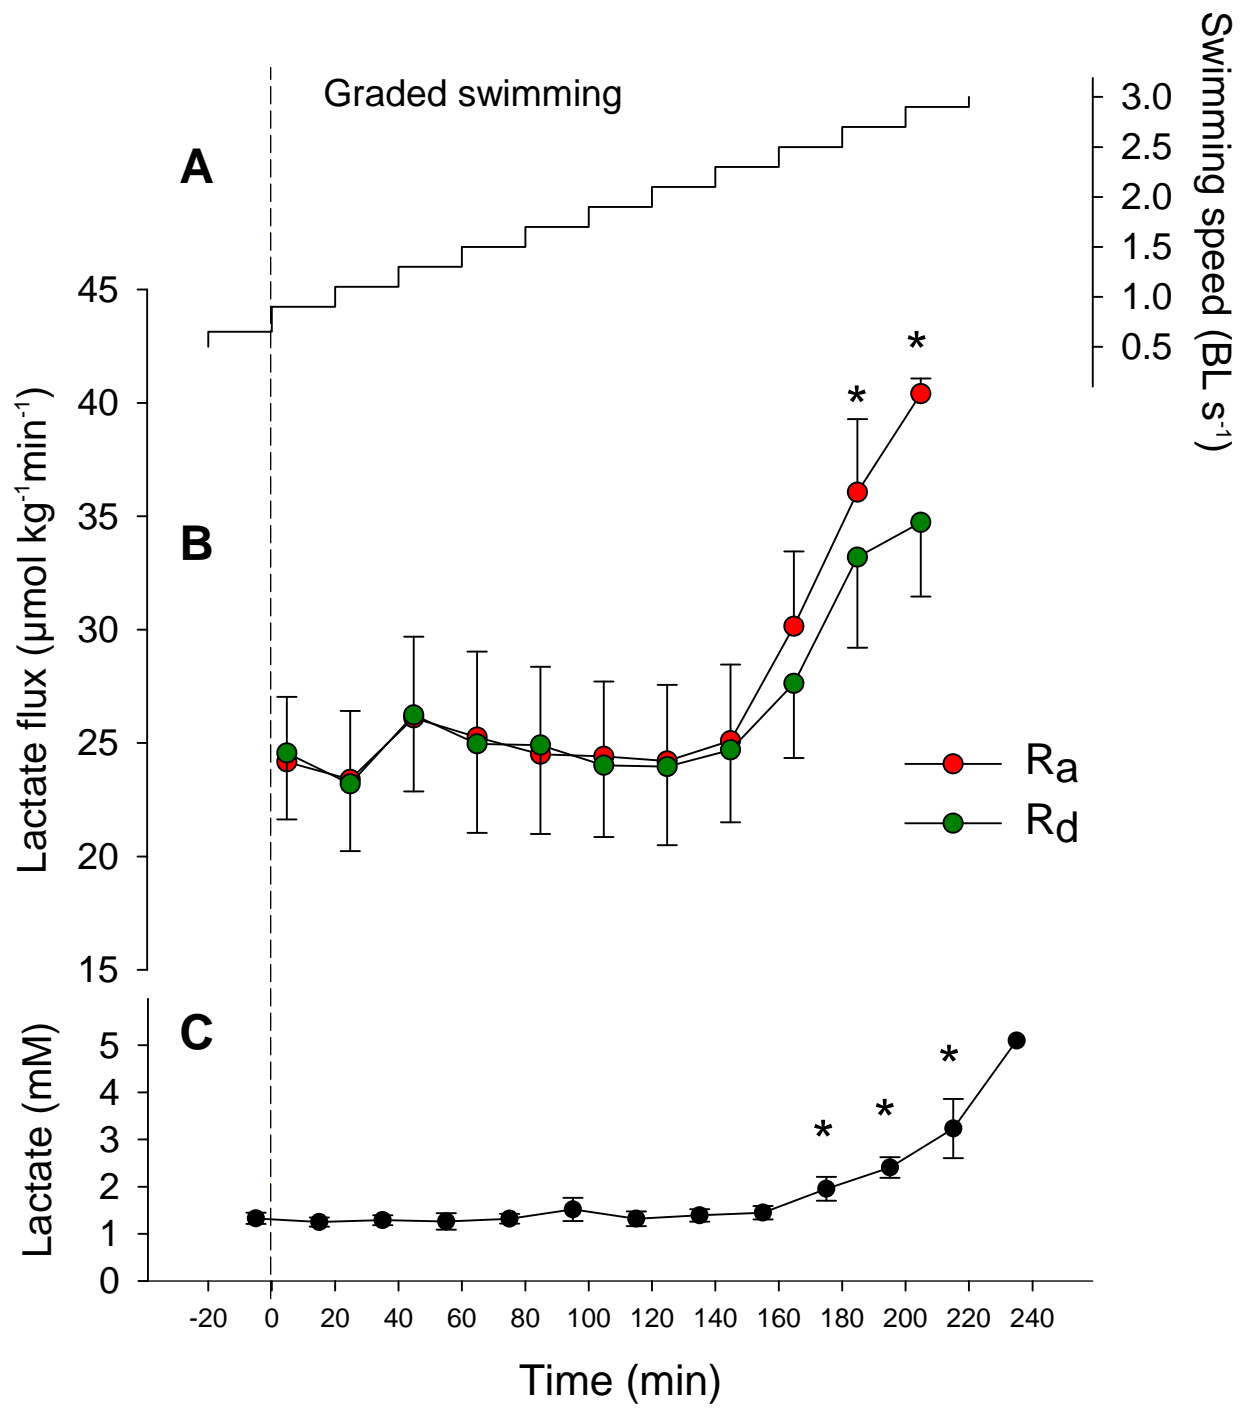

Fig. 4

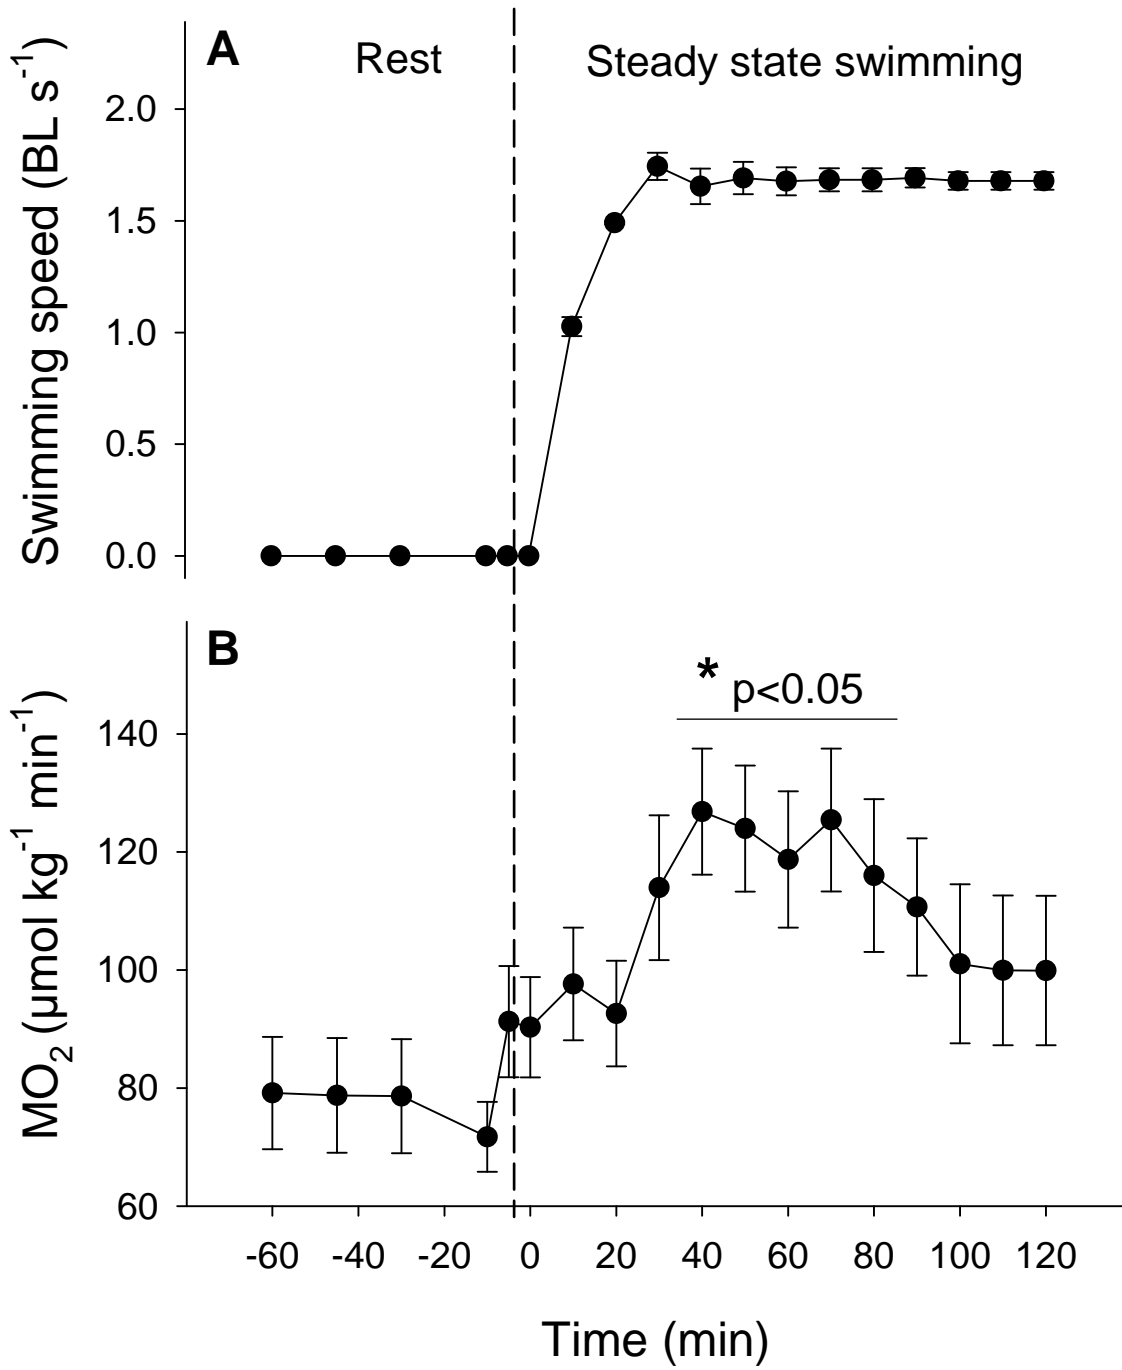

Fig. 5

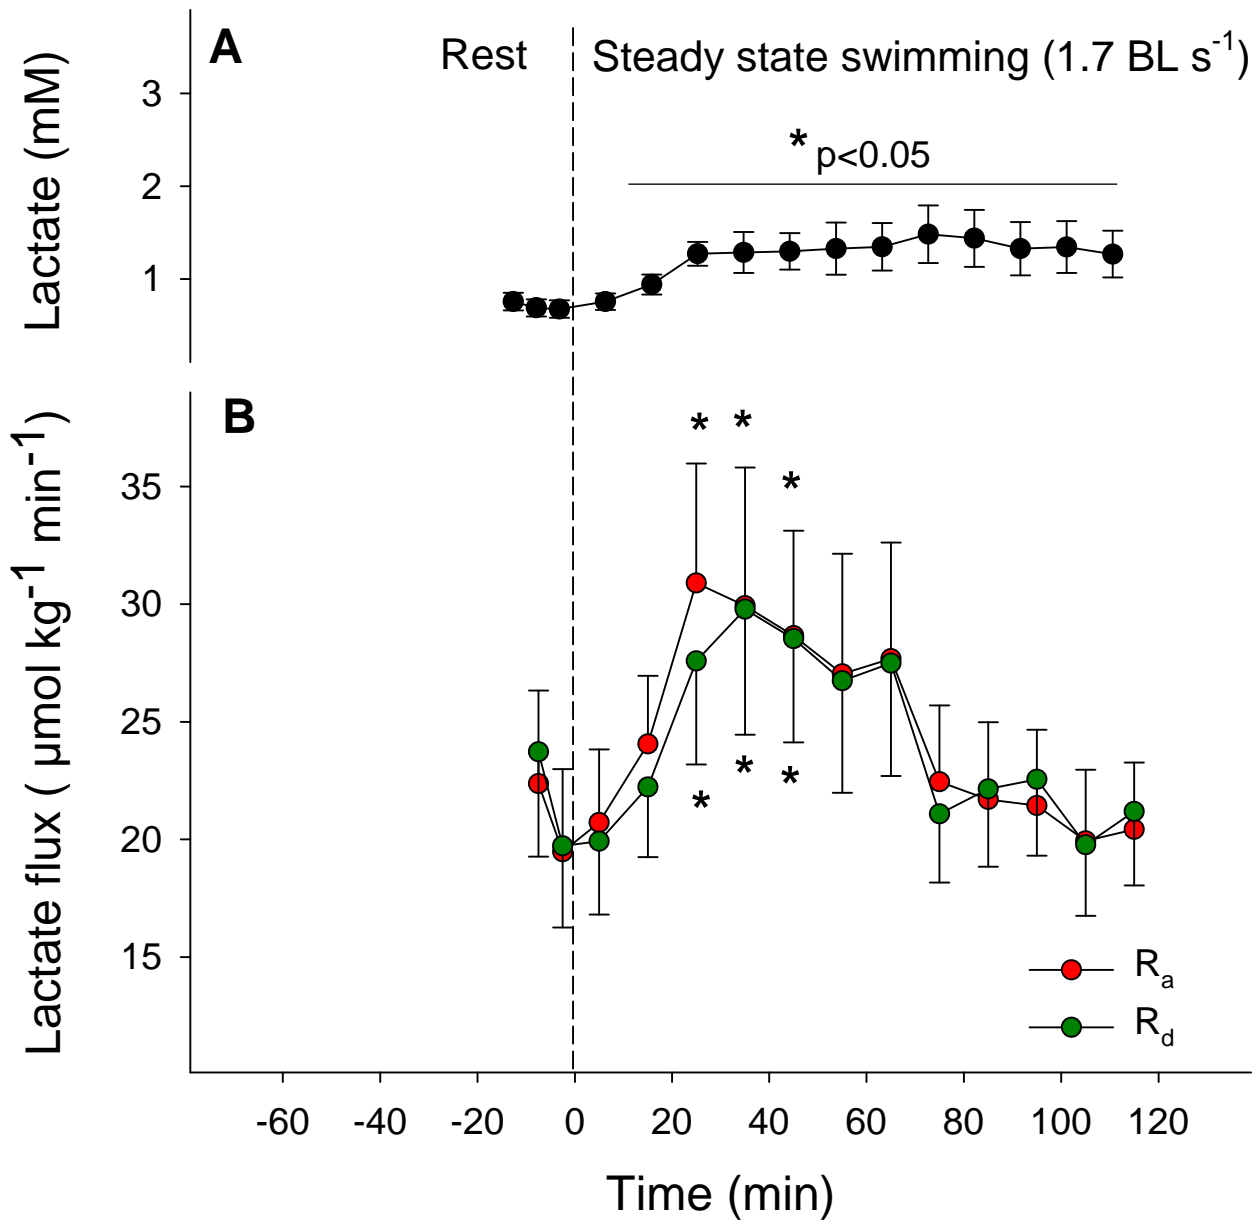

Fig. 6
